# Supplementary material for: Urolithin A attenuates auditory cell senescence by activating mitophagy
Source: PubMed Central journal article supplement (PMC9095590; doi:10.1038/s41598-022-11894-2), 2022-05-11
Supplement: 41598_2022_11894_MOESM1_ESM.pdf [file 41598_2022_11894_MOESM1_ESM.pdf]

# **Urolithin A attenuates auditory cell senescence by activating mitophagy**

**Sung Il Cho<sup>1</sup>, Eu-Ri Jo<sup>1</sup>, Hansoo Song<sup>2</sup>**

**Department of Otolaryngology-Head and Neck Surgery<sup>1</sup>, Department of Occupational & Environmental Medicine<sup>2</sup>, Chosun University College of Medicine, Gwangju, South Korea**

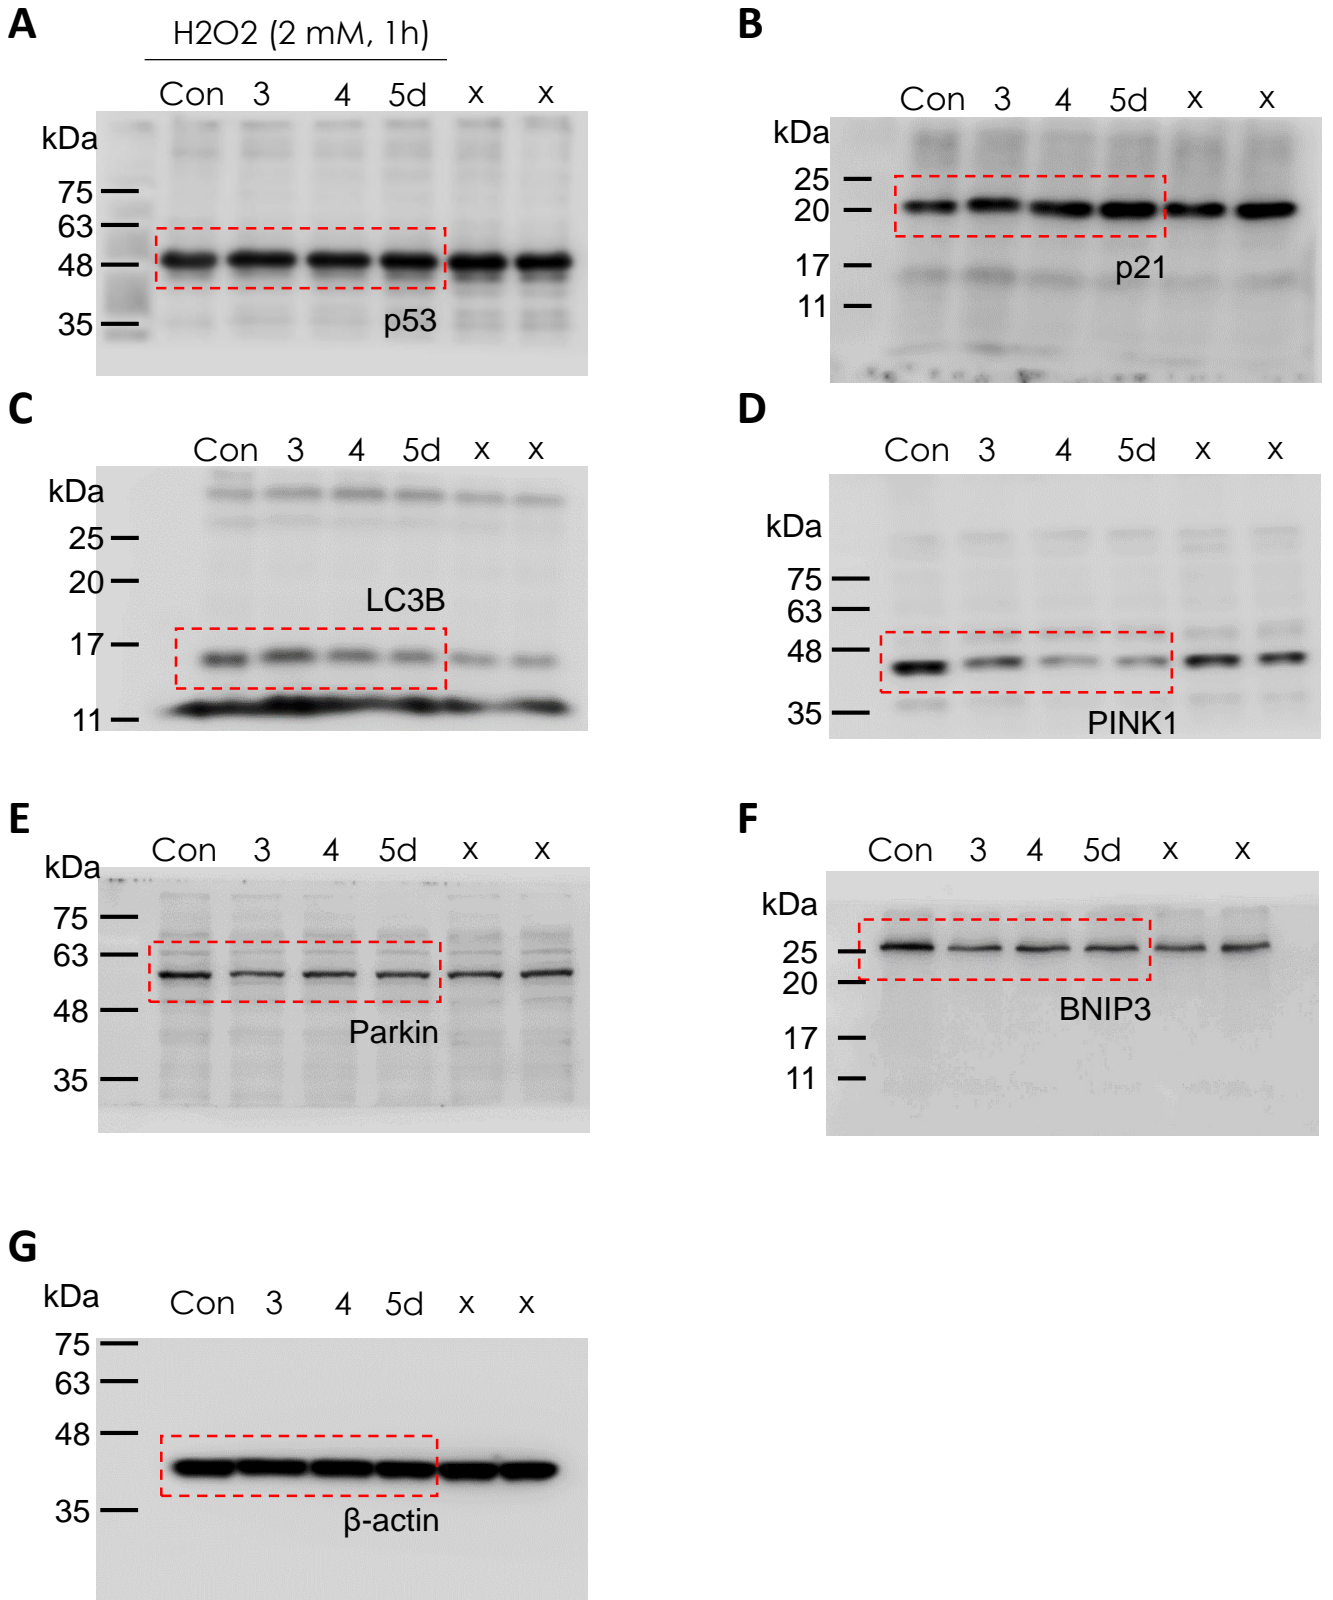

**Supplementary Figure S1A.** Full-length blots for Figure 1A. Red boxes surround the cropped portions of each blot displayed in the Figure 1A. (A) Antibody: p53, SDS-PAGE 12% gel. (B) Antibody: p21, SDS-PAGE 12% gel. (C) Antibody: LC3B, SDS-PAGE 12% gel. (D) Antibody: PINK1, SDS-PAGE 12% gel. (E) Antibody: Parkin, SDS-PAGE 12% gel. (F) Antibody: BNIP3, SDS-PAGE 12% gel. (G) Antibody:  $\beta$ -actin, SDS-PAGE 12% gel.

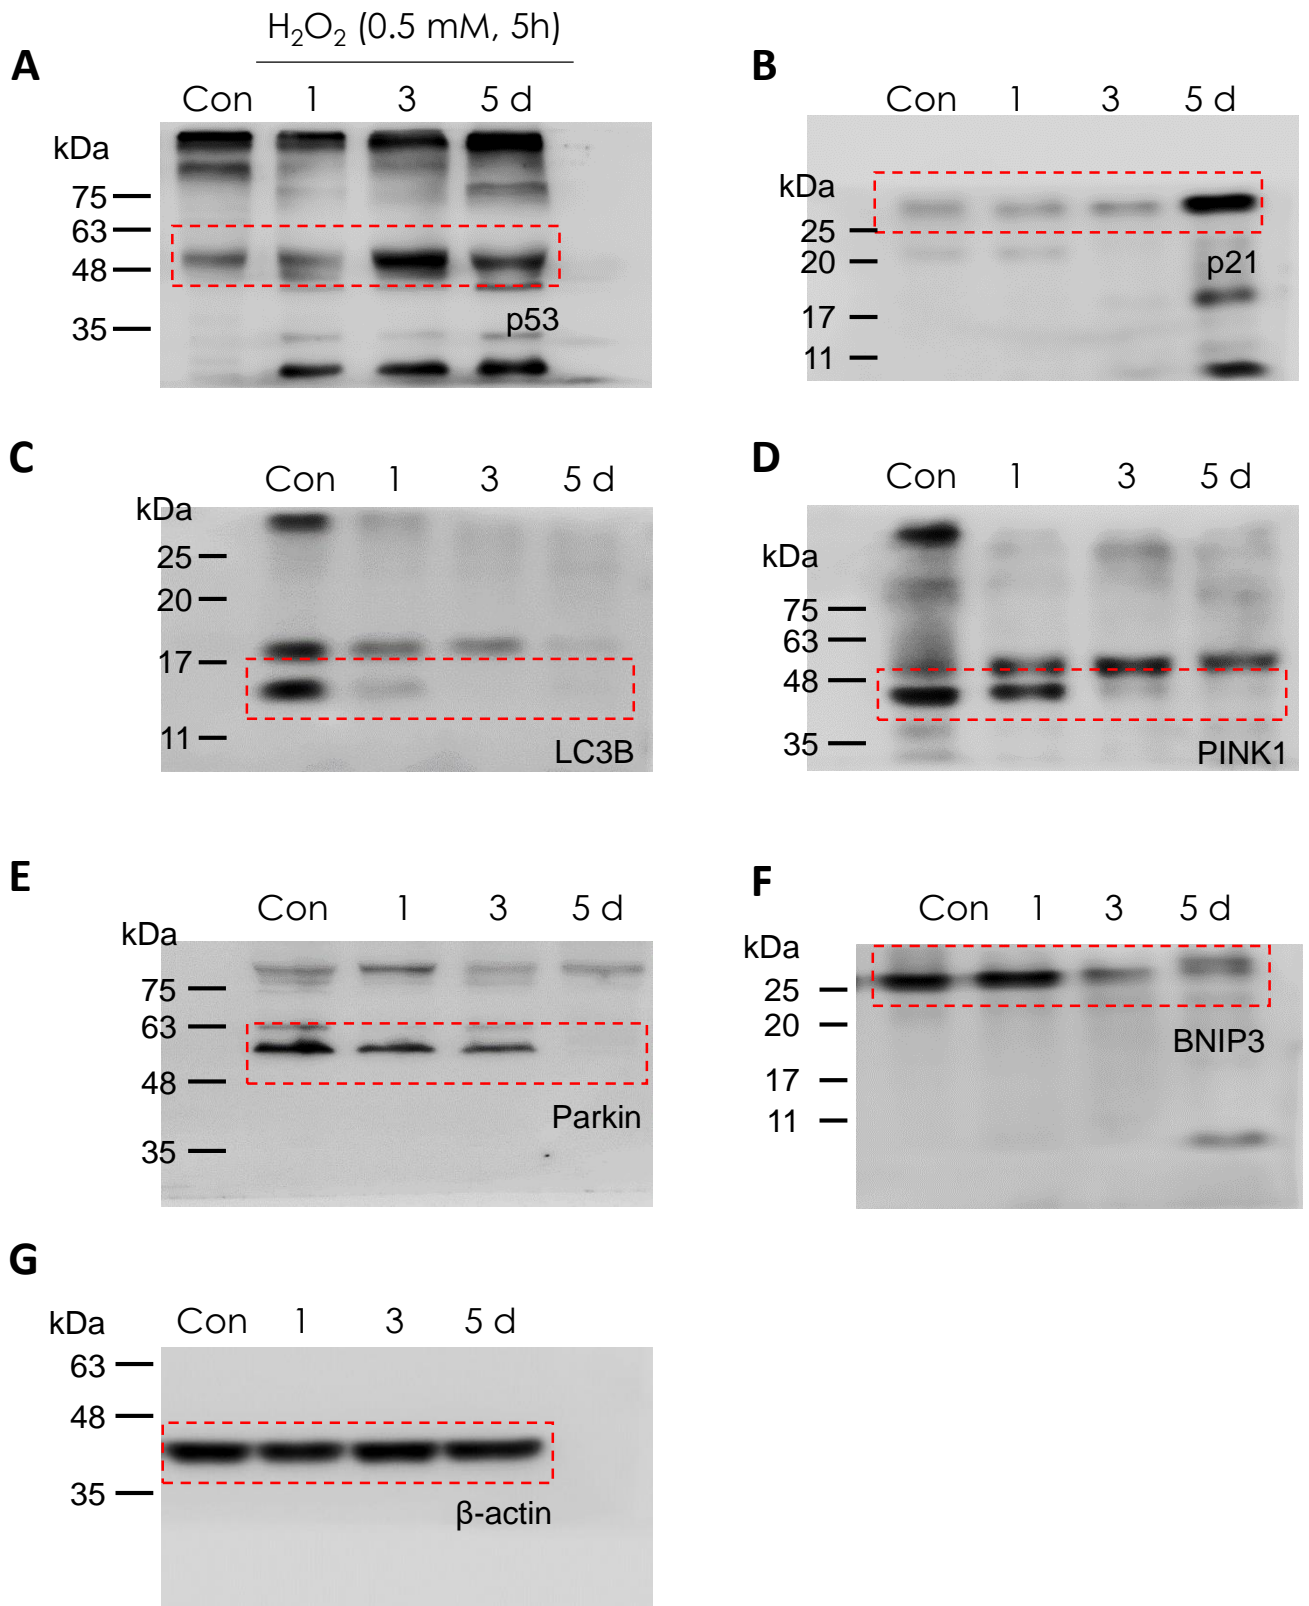

**Supplementary Figure S1B.** Full-length blots for Figure 1B. Red boxes surround the cropped portions of each blot displayed in the Figure 1B. (A) Antibody: p53, SDS-PAGE 12% gel. (B) Antibody: p21, SDS-PAGE 12% gel. (C) Antibody: LC3B, SDS-PAGE 12% gel. (D) Antibody: PINK1, SDS-PAGE 12% gel. (E) Antibody: Parkin, SDS-PAGE 12% gel. (F) Antibody: BNIP3, SDS-PAGE 12% gel. (G) Antibody:  $\beta$ -actin, SDS-PAGE 12% gel.

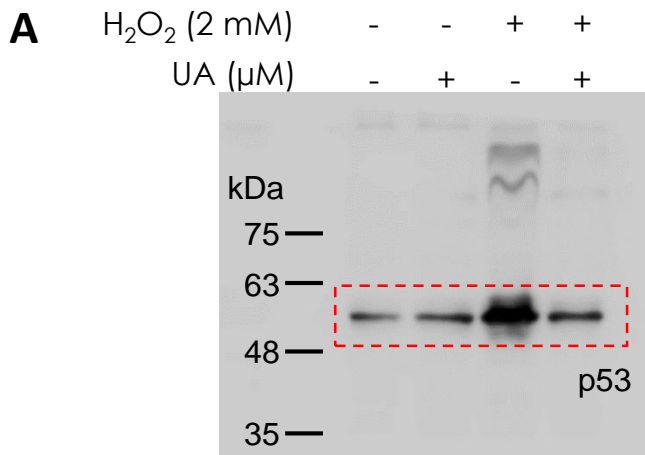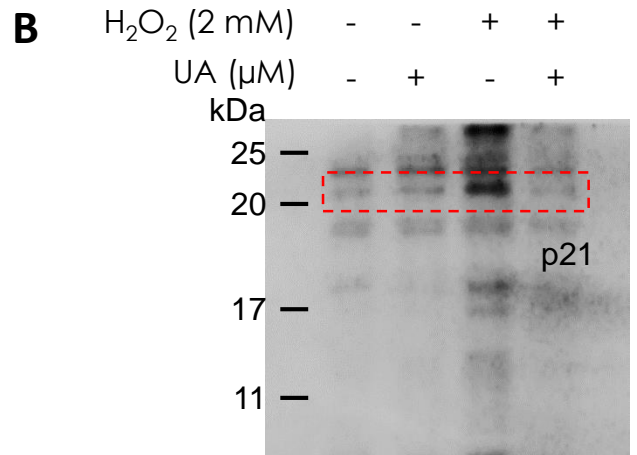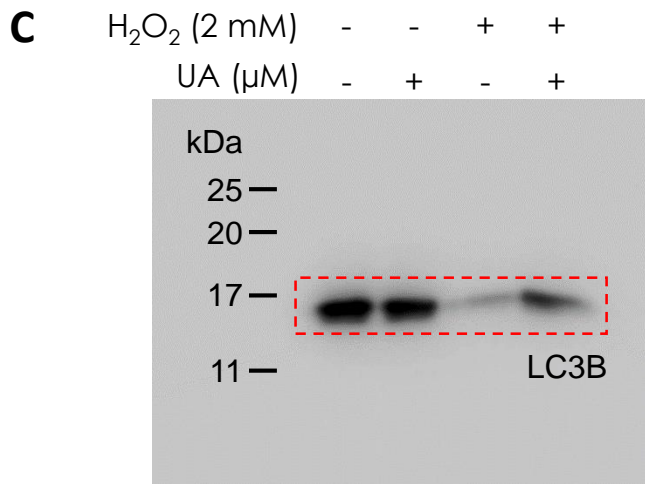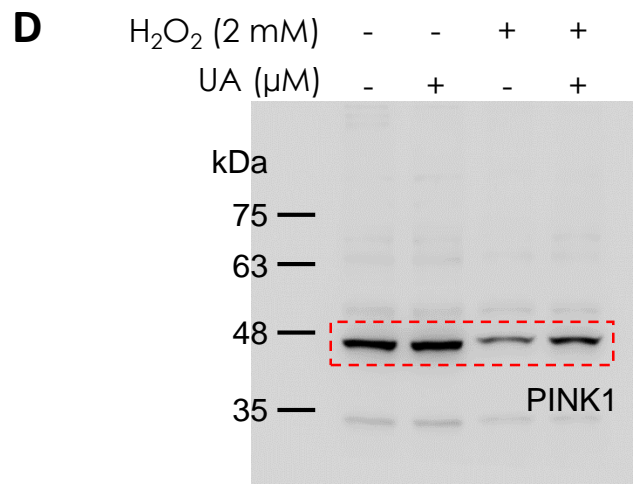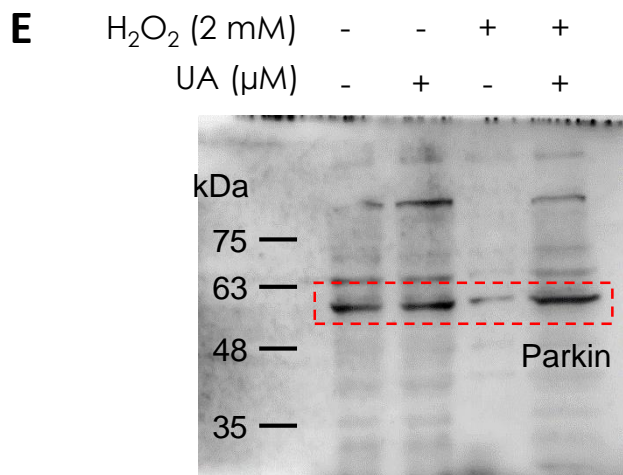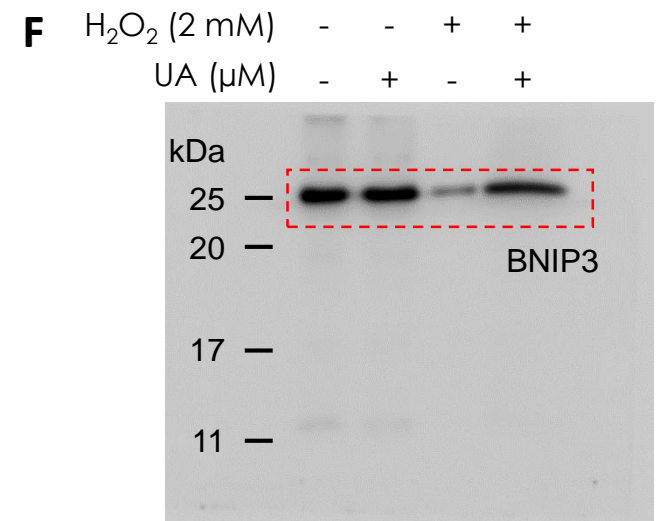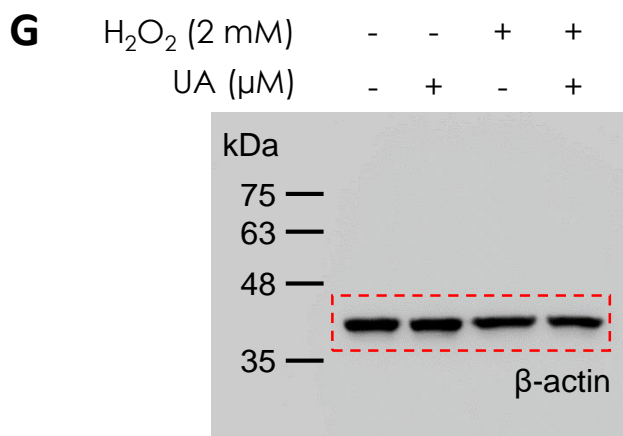

**Supplementary Figure S2.** Full-length blots for Figure 3A. Red boxes surround the cropped portions of each blot displayed in the Figure 3A. (A) Antibody: p53, SDS-PAGE 12% gel. (B) Antibody: p21, SDS-PAGE 12% gel. (C) Antibody: LC3B, SDS-PAGE 12% gel. (D) Antibody: PINK1, SDS-PAGE 12% gel. (E) Antibody: Parkin, SDS-PAGE 12% gel. (F) Antibody: BNIP3, SDS-PAGE 12% gel. (G) Antibody: β-actin, SDS-PAGE 12% gel.

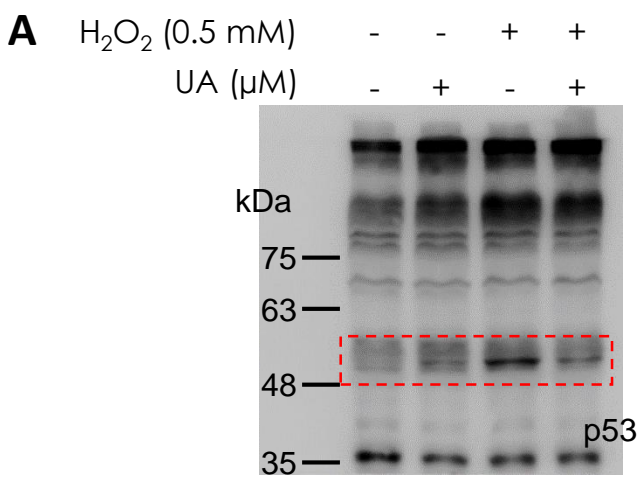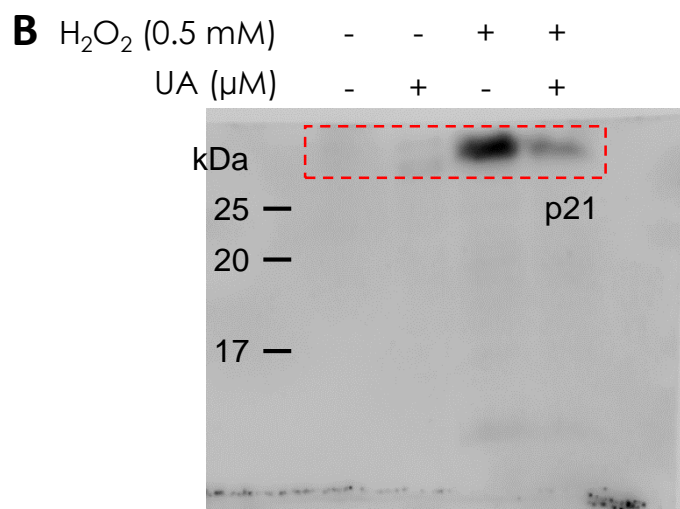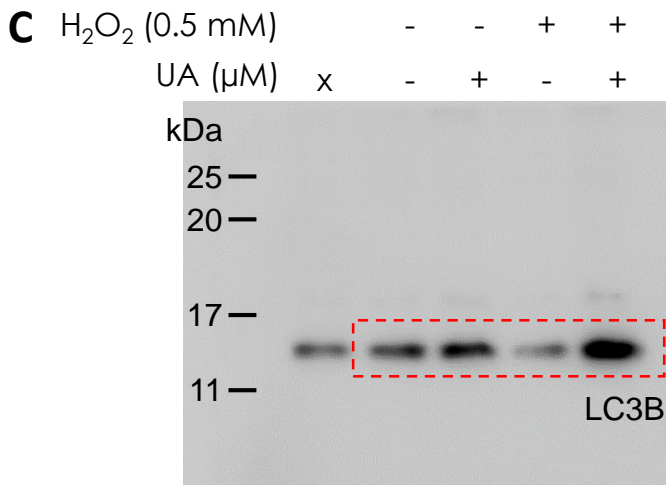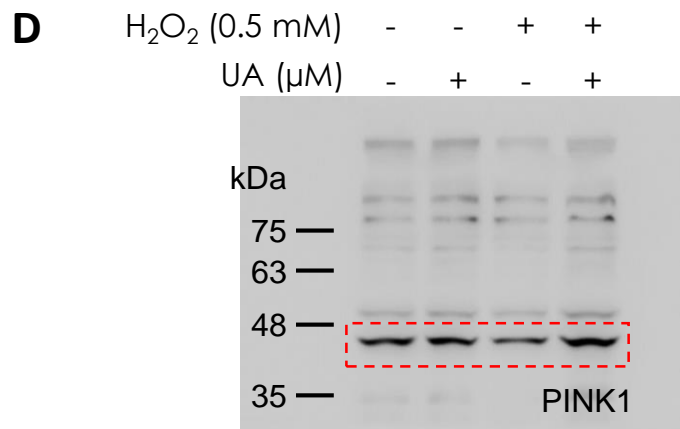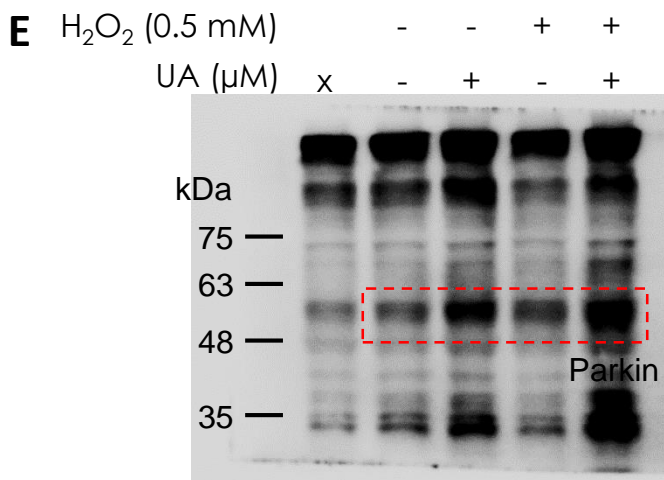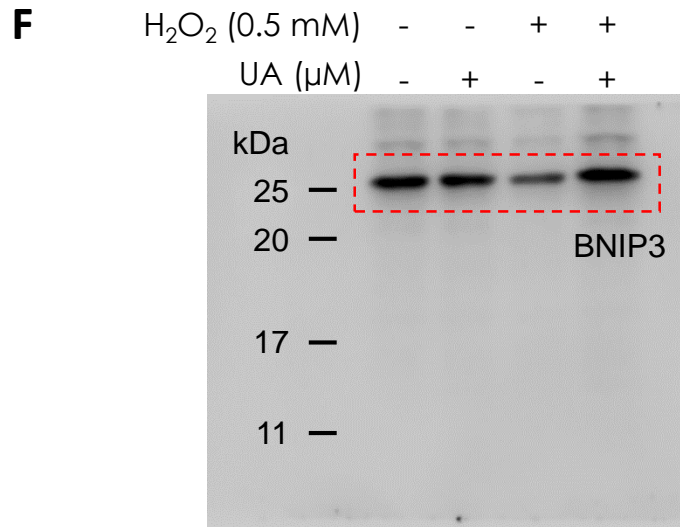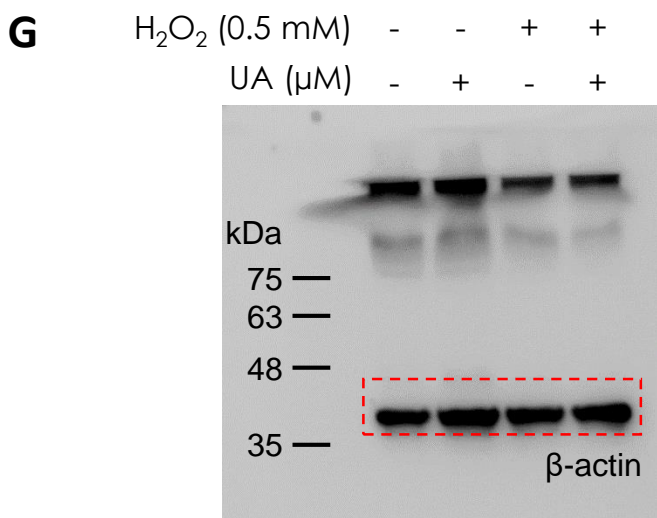

**Supplementary Figure S3.** Full-length blots for Figure 4A. Red boxes surround the cropped portions of each blot displayed in the Figure 4A. (A) Antibody: p53, SDS-PAGE 12% gel. (B) Antibody: p21, SDS-PAGE 12% gel. (C) Antibody: LC3B, SDS-PAGE 12% gel. (D) Antibody: PINK1, SDS-PAGE 12% gel. (E) Antibody: Parkin, SDS-PAGE 12% gel. (F) Antibody: BNIP3, SDS-PAGE 12% gel. (G) Antibody: β-actin, SDS-PAGE 12% gel.
